# Supplementary material
Source: PubMed Central journal article supplement (PMC3826374)
Supplement: supp_131469_edit-ecigs-1-at.pdf [file supp_131469_edit-ecigs-1-at.pdf]

## Appendix 1: References

1. Torjesen I. E-cigarettes are to be regulated as medicines from 2016. *BMJ* 2013;346:f3859.
2. Drill S. FDA discusses banning online sales of e-cigarettes. *Wall Street J* [New York] 2013 Aug. 23. Available: <http://online.wsj.com/article/SB10001424127887323980604579028872575240180.html> (accessed 2013 Sept. 26).
3. Health Canada advises Canadians not to use electronic cigarettes. Ottawa (ON): Health Canada; 2009. Available: [www.healthycanadians.gc.ca/recall-alert-rappel-avis/hc-sc/2009/13373a-eng.php](http://www.healthycanadians.gc.ca/recall-alert-rappel-avis/hc-sc/2009/13373a-eng.php) (accessed 2013 Sept. 26).
4. Notes from the field: electronic cigarette use among middle and high school students — United States, 2011–2012. *MMWR Morb Mortal Wkly Rep* 2013;62:729-30.
5. Bullen C, Howe C, Laugesen M, et al. Electronic cigarettes for smoking cessation: a randomised controlled trial. *Lancet* 2013;Sept. 9 [Epub ahead of print].
